# Supplementary material for: Differential vulnerability of the dentate gyrus to tauopathies in dementias
Source: PubMed Central journal article supplement (PMC9811688; doi:10.1186/s40478-022-01485-7), 2023-01-03
Supplement: 40478_2022_1485_MOESM1_ESM.pdf [file 40478_2022_1485_MOESM1_ESM.pdf]

## Supplementary Data

**Table 1. Characteristics**

|       | Sex | Age at Death (yrs) | PMI (hrs) | Brain Weight (g) | Age of Onset | Disease Duration (yrs) | Education (yrs) | ApoE | Clinical Dx  | Tauopathy |
|-------|-----|--------------------|-----------|------------------|--------------|------------------------|-----------------|------|--------------|-----------|
| PiD 1 | M   | 75                 | 27        | 1125             | 66           | 9                      | 14              | UNK  | PPA (Mixed)  | PiD       |
| PiD 2 | M   | 65                 | UNK       | 1055             | 53           | 12                     | 14              | 3,3  | PPA-G        | PiD       |
| PiD 3 | F   | 76                 | 3.5       | 965              | 64           | 12                     | 16              | 3,4  | PPA-G        | PiD       |
| PiD 4 | M   | 70                 | 5         | 1018             | 56           | 14                     | 20              | 3,3  | PPA-G        | PiD       |
| PiD 5 | F   | 68                 | 14        | 1010             | 60           | 8                      | 16              | 3,3  | PPA-G        | PiD       |
| PiD 6 | F   | 64                 | 28        | 990              | 53           | 11                     | 16              | 3,4  | PPA-S        | PiD       |
| PiD 7 | M   | 69                 | 5         | 1100             | 62           | 7                      | 12              | 3,3  | PPA (Severe) | PiD       |
| PiD 8 | F   | 71                 | 8         | 830              | 58           | 13                     | 17              | 3,3  | PPA (Unsub)  | PiD       |
| CBD 1 | F   | 72                 | 16        | 980              | 67           | 5                      | 14              | UNK  | PPA-G        | CBD       |
| CBD 2 | F   | 74                 | 5         | 1168             | 66           | 8                      | 14              | 3,3  | PPA-G        | CBD       |
| CBD 3 | F   | 71                 | 9         | 990              | 62           | 9                      | 18              | 3,3  | PPA-L^       | CBD       |
| CBD 4 | M   | 83                 | 8         | 1080             | 65           | 18                     | 20              | 3,4  | PPA-G        | CBD       |
| CBD 5 | M   | 75                 | 46        | 1349             | 65           | 10                     | 16              | 3,3  | PPA-G        | CBD       |
| CBD 6 | F   | 69                 | UNK       | 1050             | 60           | 9                      | 18              | 3,3  | PPA-G        | CBD       |
| CBD 7 | M   | 69                 | 18        | 1160             | 60           | 9                      | 16              | 3,3  | PPA-G        | CBD       |
| CBD 8 | F   | 87                 | 7         | 1120             | 74           | 13                     | 14              | 3,3  | PPA (Mixed)  | CBD       |
| PSP 1 | F   | 82                 | 16        | 1280             | 77           | 5                      | 14              | 3,4  | PPA (Severe) | PSP       |
| PSP 2 | F   | 82                 | 9         | 1060             | 70           | 12                     | 16              | 3,3  | PPA-G        | PSP       |
| PSP 3 | F   | 66                 | 17        | 1120             | 62           | 4                      | 14              | 3,3  | PPA-Gsp      | PSP       |
| PSP 4 | F   | 88                 | 7         | 970              | 78           | 10                     | 14              | 3,3  | PPA-G        | PSP       |
| PSP 5 | M   | 73                 | 25        | 1262             | 63           | 10                     | 14              | 2,2  | PPA-G        | PSP       |

|          |   |    |    |       |    |    |    |     |              |     |
|----------|---|----|----|-------|----|----|----|-----|--------------|-----|
| PSP 6    | M | 78 | 6  | 1100* | 68 | 10 | 16 | 3,3 | PPA-Gsp      | PSP |
| PSP 7    | M | 87 | 7  | 1315  | 79 | 8  | 20 | 2,3 | PPA-G        | PSP |
| PSP 8    | F | 84 | 67 | 1250  | 73 | 11 | 16 | 3,3 | PPA-G        | PSP |
| PPA-AD 1 | F | 77 | 18 | 1250  | 71 | 6  | 16 | 3,3 | PPA-L        | AD  |
| PPA-AD 2 | M | 71 | 24 | 1250  | 59 | 12 | 15 | 3,4 | PPA (Mixed)  | AD  |
| PPA-AD 3 | M | 87 | 6  | 1100  | 80 | 7  | 16 | 3,4 | PPA-L        | AD  |
| PPA-AD 4 | M | 81 | 6  | 1110* | 68 | 13 | 20 | 3,3 | PPA-G        | AD  |
| PPA-AD 5 | M | 75 | 8  | 1030* | 62 | 13 | 19 | 3,4 | PPA-L        | AD  |
| PPA-AD 6 | M | 63 | 14 | 1120  | 55 | 8  | 13 | 3,3 | PPA (Mixed)  | AD  |
| PPA-AD 7 | F | 66 | 19 | 890   | 51 | 15 | 19 | 3,3 | PPA-L        | AD  |
| PPA-AD 8 | M | 61 | 19 | 1300  | 52 | 9  | 14 | 3,4 | PPA (Severe) | AD  |
| DAT-AD 1 | M | 80 | 20 | 1390  | 74 | 6  | 14 | 3,4 | DAT          | AD  |
| DAT-AD 2 | M | 71 | 6  | 1210  | 54 | 17 | 12 | 4,4 | DAT          | AD  |
| DAT-AD 3 | F | 89 | 71 | 980   | 76 | 13 | 18 | 3,4 | DAT          | AD  |
| DAT-AD 4 | F | 82 | 7  | 1170  | 73 | 9  | 16 | 3,3 | DAT          | AD  |
| DAT-AD 5 | F | 85 | 5  | 1140  | 74 | 11 | 12 | 3,4 | DAT          | AD  |

M=male; F=female; \*=fixed; PMI=postmortem interval; UNK=unknown; ApoE=apolipoprotein E; PPA=primary progressive aphasia; DAT=dementia of the Alzheimer's type; G=agrammatic; Gsp=agrammatic with motor speech deficits; L=logopenic; S=semantic; L^=Logopenic with mild repetition problems; (Mixed)=patient displayed a mixed subtype; (Severe)=patient was too severe to subtype accurately; (Unsub)=patient was not subtyped; PiD=Pick's Disease; CBD=corticobasal degeneration; PSP=progressive supranuclear palsy; AD=Alzheimer's Disease
